# Supplementary material for: Discrimination between two memory channels by molecular alloying in a doubly bistable spin crossover material
Source: PubMed Central journal article supplement — Chem Sci. 2019 Feb 22;10(13):3807–16. doi: 10.1039/c8sc05256e (PMC6457193; doi:10.1039/c8sc05256e), 2019-02-22

## Electronic Supplementary Information

### Discrimination between two memory channels by molecular alloying in a doubly bistable spin crossover material

Francisco Javier Valverde-Muñoz, Maksym Seredyuk, Manuel Meneses-Sanchez, M. Carmen Muñoz, Carlos Bartual-Murgui, José A. Real

**Table S1.** Crystallographic parameters for **100As**, **71As** and **100Ni**.

|                                                | <b>100As</b>                                                                      |             | <b>71As</b>                                                                                            |                     |           | <b>100Ni</b>                                                                     |
|------------------------------------------------|-----------------------------------------------------------------------------------|-------------|--------------------------------------------------------------------------------------------------------|---------------------|-----------|----------------------------------------------------------------------------------|
|                                                | 230 K                                                                             | 300 K       | 230 K                                                                                                  | 120 K<br>(quenched) | 157 K     | 110 K                                                                            |
| Empirical formula                              | C <sub>30</sub> H <sub>48</sub> As <sub>2</sub> F <sub>12</sub> FeN <sub>10</sub> |             | C <sub>30</sub> H <sub>48</sub> As <sub>1.42</sub> F <sub>12</sub> FeN <sub>10</sub> P <sub>0.58</sub> |                     |           | C <sub>30</sub> H <sub>48</sub> F <sub>12</sub> N <sub>10</sub> NiP <sub>2</sub> |
| Mr                                             | 982.47                                                                            |             | 956.98                                                                                                 |                     |           | 897.43                                                                           |
| Crystal system                                 | triclinic                                                                         |             | triclinic                                                                                              |                     |           | triclinic                                                                        |
| Space group                                    | P1                                                                                |             | P1                                                                                                     |                     |           | P1                                                                               |
| <i>a</i> (Å)                                   | 9.4189(8)                                                                         | 9.6140(7)   | 9.411(3)                                                                                               | 9.2858(5)           | 9.588(3)  | 9.1245 (3)                                                                       |
| <i>b</i> (Å)                                   | 10.3506(9)                                                                        | 10.2571(6)  | 10.309(3)                                                                                              | 10.4090(6)          | 10.065(2) | 10.5150 (2)                                                                      |
| <i>c</i> (Å)                                   | 22.444(2)                                                                         | 21.9999(13) | 22.379(5)                                                                                              | 22.272(2)           | 21.074(4) | 21.6376 (4)                                                                      |
| $\alpha$                                       | 91.428(7)                                                                         | 91.522(5)   | 91.520(11)                                                                                             | 83.796(5)           | 93.89(2)  | 83.769 (2)                                                                       |
| $\beta$                                        | 100.894(7)                                                                        | 96.193(6)   | 100.995(12)                                                                                            | 78.275(5)           | 93.68(2)  | 78.852 (2)                                                                       |
| $\gamma$                                       | 99.001(7)                                                                         | 98.456(6)   | 98.955(16)                                                                                             | 81.416(5)           | 100.47(2) | 81.928 (2)                                                                       |
| <i>V</i> (Å <sup>3</sup> )                     | 2118.8(3)                                                                         | 2131.3(2)   | 2101.8(11)                                                                                             | 2077.5(2)           | 1989.2(8) | 2009.56 (9)                                                                      |
| <i>Z</i>                                       | 2                                                                                 |             | 2                                                                                                      |                     |           | 2                                                                                |
| <i>F</i> (000)                                 | 996                                                                               | 996         | 976.0                                                                                                  | 975                 | 975       | 928                                                                              |
| <i>D</i> <sub>c</sub> (mg cm <sup>-3</sup> )   | 1.540                                                                             | 1.531       | 1.514                                                                                                  | 1.530               | 1.598     | 1.483                                                                            |
| $\mu$ (Mo-K $\alpha$ )(mm <sup>-1</sup> )      | 1.993                                                                             | 1.982       | 1.597                                                                                                  | 1.597               | 1.668     |                                                                                  |
| No. of total reflections                       |                                                                                   |             |                                                                                                        |                     |           |                                                                                  |
| [ <i>I</i> >2 $\sigma$ ( <i>I</i> )]           | 5545                                                                              | 3523        | 10380                                                                                                  | 4016                | 2958      | 6677                                                                             |
| <i>R</i> [ <i>I</i> >2 $\sigma$ ( <i>I</i> )]  | 0.0646                                                                            | 0.0903      | 0.0563                                                                                                 | 0.0516              | 0.1247    | 0.042                                                                            |
| <i>wR</i> [ <i>I</i> >2 $\sigma$ ( <i>I</i> )] | 0.1470                                                                            | 0.2341      | 0.1406                                                                                                 | 0.0969              | 0.2859    | 0.131                                                                            |
| <i>S</i>                                       | 1.013                                                                             | 0.946       | 1.050                                                                                                  | 1.047               | 1.008     | 0.72                                                                             |

**Table S2.** Selected bond lengths (Å) and angles (°) for **100As** at indicated temperatures.

|          | <b>100As</b>                     |                                  | <b>71As</b>                                               |                                  |                                  |
|----------|----------------------------------|----------------------------------|-----------------------------------------------------------|----------------------------------|----------------------------------|
|          | 230 K ( <b>HS</b> <sup>1</sup> ) | 300 K ( <b>HS</b> <sup>2</sup> ) | 120 K ( <b>HS</b> <sup>1</sup> + <b>LS</b> <sup>1</sup> ) | 157 K ( <b>LS</b> <sup>2</sup> ) | 230 K ( <b>HS</b> <sup>2</sup> ) |
| Fe-N1    | 2.228(4)                         | 2.219(7)                         | 2.206(5)                                                  | 1.962(11)                        | 2.222(3)                         |
| Fe-N2    | 2.184(4)                         | 2.185(6)                         | 2.164(4)                                                  | 1.969(10)                        | 2.181(3)                         |
| Fe-N3    | 2.214(4)                         | 2.212(6)                         | 2.204(4)                                                  | 1.967(10)                        | 2.215(3)                         |
| Fe-N4    | 2.194(4)                         | 2.173(7)                         | 2.194(5)                                                  | 1.948(11)                        | 2.196(3)                         |
| Fe-N5    | 2.174(4)                         | 2.165(6)                         | 2.154(3)                                                  | 1.959(10)                        | 2.173(3)                         |
| Fe-N6    | 2.198(4)                         | 2.169(7)                         | 2.190(4)                                                  | 1.980(9)                         | 2.192(3)                         |
| <Fe-N>   | 2.199                            | 2.187                            | 2.185                                                     | 1.964                            | 2.197                            |
|          |                                  |                                  |                                                           |                                  |                                  |
| N1-Fe-N2 | 75.0(2)                          | 74.9(2)                          | 75.4(2)                                                   | 80.6(4)                          | 74.99(10)                        |
| N1-Fe-N3 | 92.9(2)                          | 91.6(2)                          | 93.8(2)                                                   | 93.0(4)                          | 92.64(11)                        |
| N1-Fe-N4 | 167.6(2)                         | 166.4(3)                         | 168.9(2)                                                  | 173.8(4)                         | 167.34(11)                       |
| N1-Fe-N5 | 84.4(2)                          | 85.2(2)                          | 84.5(2)                                                   | 91.4(4)                          | 84.38(11)                        |
| N1-Fe-N6 | 88.2(2)                          | 88.9(2)                          | 87.8(2)                                                   | 89.1(4)                          | 88.57(11)                        |
| N2-Fe-N3 | 98.2(2)                          | 97.8(2)                          | 97.60(14)                                                 | 92.1(4)                          | 98.22(11)                        |
| N2-Fe-N4 | 102.5(2)                         | 103.4(2)                         | 102.4(2)                                                  | 96.0(4)                          | 102.73(11)                       |
| N2-Fe-N5 | 158.4(2)                         | 159.7(2)                         | 159.0(2)                                                  | 171.8(4)                         | 158.30(11)                       |
| N2-Fe-N6 | 97.1(2)                          | 99.5(2)                          | 97.19(14)                                                 | 96.6(4)                          | 96.78(11)                        |
| N3-Fe-N4 | 75.3(2)                          | 75.2(2)                          | 75.6(2)                                                   | 81.9(4)                          | 75.24(10)                        |
| N3-Fe-N5 | 89.2(2)                          | 86.7(2)                          | 89.49(14)                                                 | 90.3(4)                          | 89.26(11)                        |
| N3-Fe-N6 | 164.4(2)                         | 162.1(2)                         | 165.05(13)                                                | 171.3(4)                         | 164.74(11)                       |
| N4-Fe-N5 | 99.0(2)                          | 97.0(2)                          | 98.4(2)                                                   | 92.1(4)                          | 98.87(11)                        |
| N4-Fe-N6 | 104.3(2)                         | 104.7(3)                         | 103.3(2)                                                  | 96.5(4)                          | 104.08(10)                       |
| N5-Fe-N6 | 75.4(2)                          | 75.5(3)                          | 75.85(14)                                                 | 81.3(4)                          | 75.72(11)                        |

**Table S3.** Selected bond lengths (Å) and angles (°) for **100Ni** at 110 K.

| <b>100Ni</b> |           |
|--------------|-----------|
| Ni-N1        | 2.100(2)  |
| Ni-N2        | 2.119(2)  |
| Ni-N3        | 2.098(2)  |
| Ni-N4        | 2.131(2)  |
| Ni-N5        | 2.064(2)  |
| Ni-N6        | 2.147(2)  |
| <Fe-N>       | 2.110     |
|              |           |
| N1-Ni-N2     | 78.43(6)  |
| N1-Ni-N4     | 172.44(6) |
| N1-Ni-N6     | 88.44(6)  |
| N2-Ni-N4     | 96.71(6)  |
| N2-Ni-N6     | 94.45(6)  |
| N3-Ni-N1     | 95.96(6)  |
| N3-Ni-N2     | 95.34(6)  |
| N3-Ni-N4     | 78.62(6)  |
| N3-Ni-N6     | 169.90(6) |
| N4-Ni-N6     | 97.76(6)  |
| N5-Ni-N1     | 89.36(6)  |
| N5-Ni-N2     | 166.24(6) |
| N5-Ni-N3     | 92.20(7)  |
| N5-Ni-N4     | 96.06(6)  |
| N5-Ni-N6     | 78.72(6)  |

**Table S4.** Percentage of intermolecular contacts and void space obtained from the Hirshfeld surface<sup>1</sup> for **100P** and **100As** at 230 K (**HS<sup>1</sup>**) and **100As** at 300 K (**HS<sup>2</sup>**).

| <b>Intermolecular contact</b>            | <b>100P (HS<sup>1</sup>, 150 K)</b> | <b>100As (HS<sup>1</sup>, 230 K)</b> | <b>100As (HS<sup>2</sup>, 300 K)</b> |
|------------------------------------------|-------------------------------------|--------------------------------------|--------------------------------------|
| C···F (%)                                | 0.7                                 | 1.4                                  | 0.9                                  |
| F···H (%)                                | 31.9                                | 33.1                                 | 34.1                                 |
| N···H (%)                                | 3.7                                 | 3.1                                  | 1.7                                  |
| C···H (%)                                | 6.4                                 | 8.2                                  | 3.0                                  |
| Void space/Å <sup>3</sup> <sup>a,2</sup> | 46.54                               | 43.83                                | 27.10                                |
| Unit cell volume/Å <sup>3</sup>          | 2076.46                             | 2118.8                               | 2131.3                               |
| % void space <sup>b</sup>                | 2.24                                | 2.07                                 | 1.27                                 |

<sup>a</sup> Isovalue 0.0003 e AU<sup>3</sup>; <sup>b</sup> Referred to unit cell volume.

<sup>1</sup>M. J. Turner, J. J. McKinnon, S. K. Wolff, D. J. Grimwood, P. R. Spackman, D. Jayatilaka and M. A. Spackman, *CrystalExplorer17* (2017). University of Western Australia. <http://hirshfeldsurface.net>

<sup>2</sup>M. J. Turner, J. J. McKinnon, D. Jayatilaka, M. A. Spackman, *CrystEngComm*, 2011, 13, 1804-1813.

**Figure S1.** Dependence of  $\chi_M T$  vs  $T$  on the scan rate.

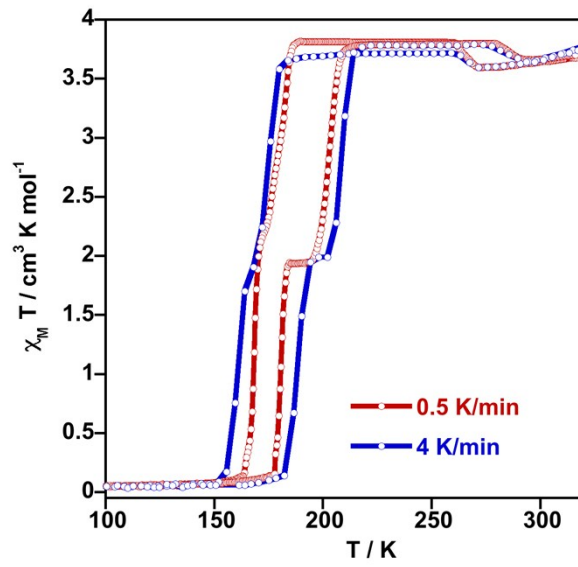

**Figure S2.** Dependence of  $\chi_M T$  vs  $T$  on the scan rate.

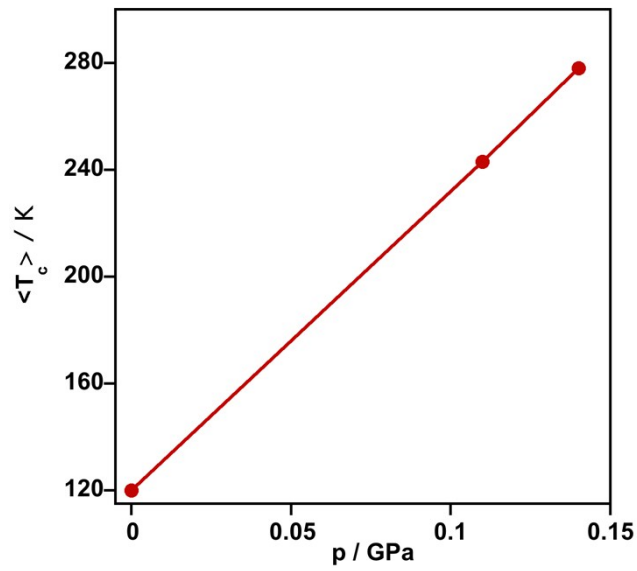

**Figure S3.** Temperature dependence of  $\chi_M T$  vs  $T$  for the molecular alloys **86As**, **63As** and **12As** (scan rate 2 K min<sup>-1</sup>).

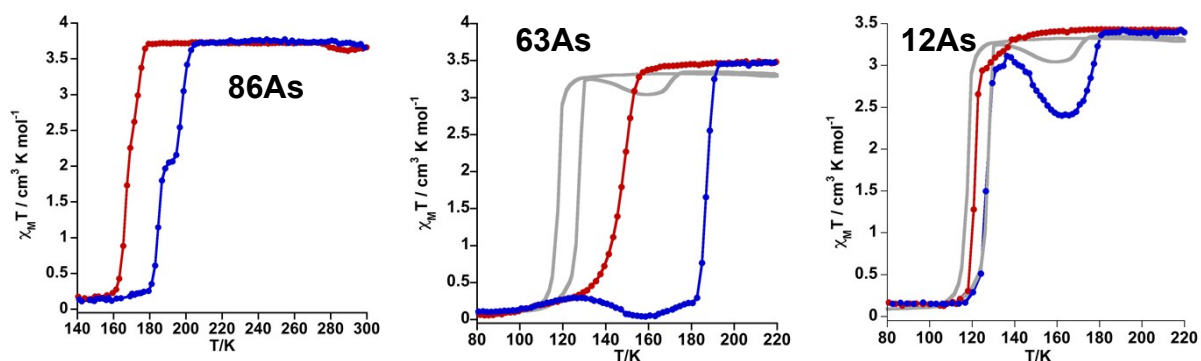

**Figure S4.** Dependence of the hysteretic behavior of the **HS<sup>1</sup>↔HS<sup>2</sup>** structural phase transition on the concentration of three selected samples (100As, 71As and 56As).

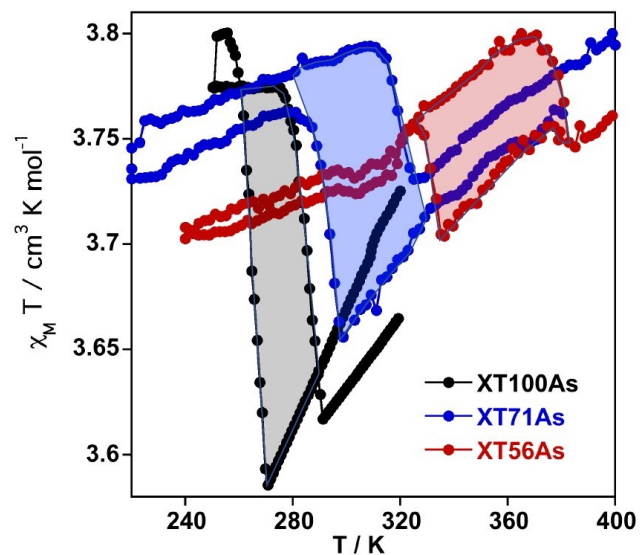

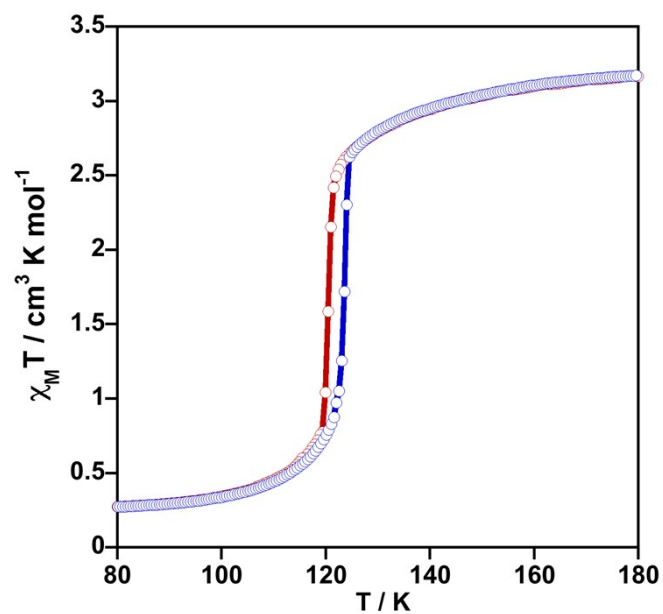

**Figure S5.** Temperature dependence of  $\chi_M T$  vs  $T$  for **17Ni**.

**Figure S6.** Temperature dependence of  $\chi_M T$  vs  $T$  for **100Ni**.

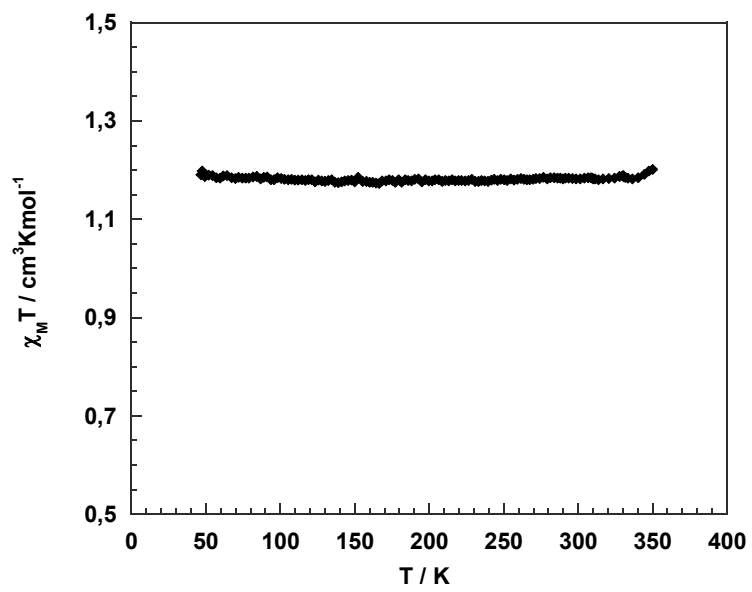



**Figure S7.** Comparison of cation  $[\text{Fe}(n\text{Bu-im})_3(\text{tren})]^{2+}$ , illustrating larger disorder or butyl groups in  $\text{LS}^2$  and  $\text{HS}^2$  phases in comparison with  $\text{LS}^1$  and  $\text{HS}^1$ , respectively. Brighter color as well as larger size of thermal ellipsoids shown at 50 % probability corresponds to larger disorder.

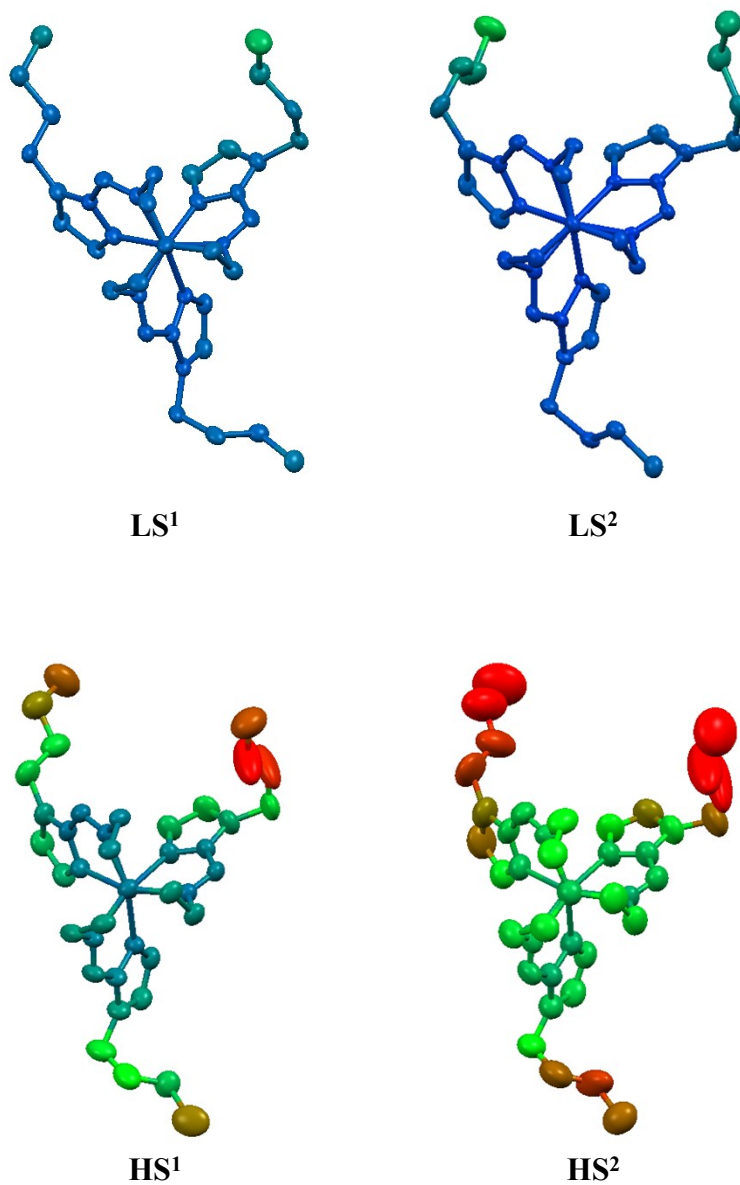

**Figure S8.** (a) Projection of the cation and two anions of **100Ni** with atom numbering scheme. Displacement ellipsoids are shown at the 50% probability level. Hydrogen atoms are omitted for clarity. (b) Overlay of the unit cells for **100P** in  $LS^1$  phase (grey bonds) and **100Ni** (red bonds and atoms), both structures at 110 K.

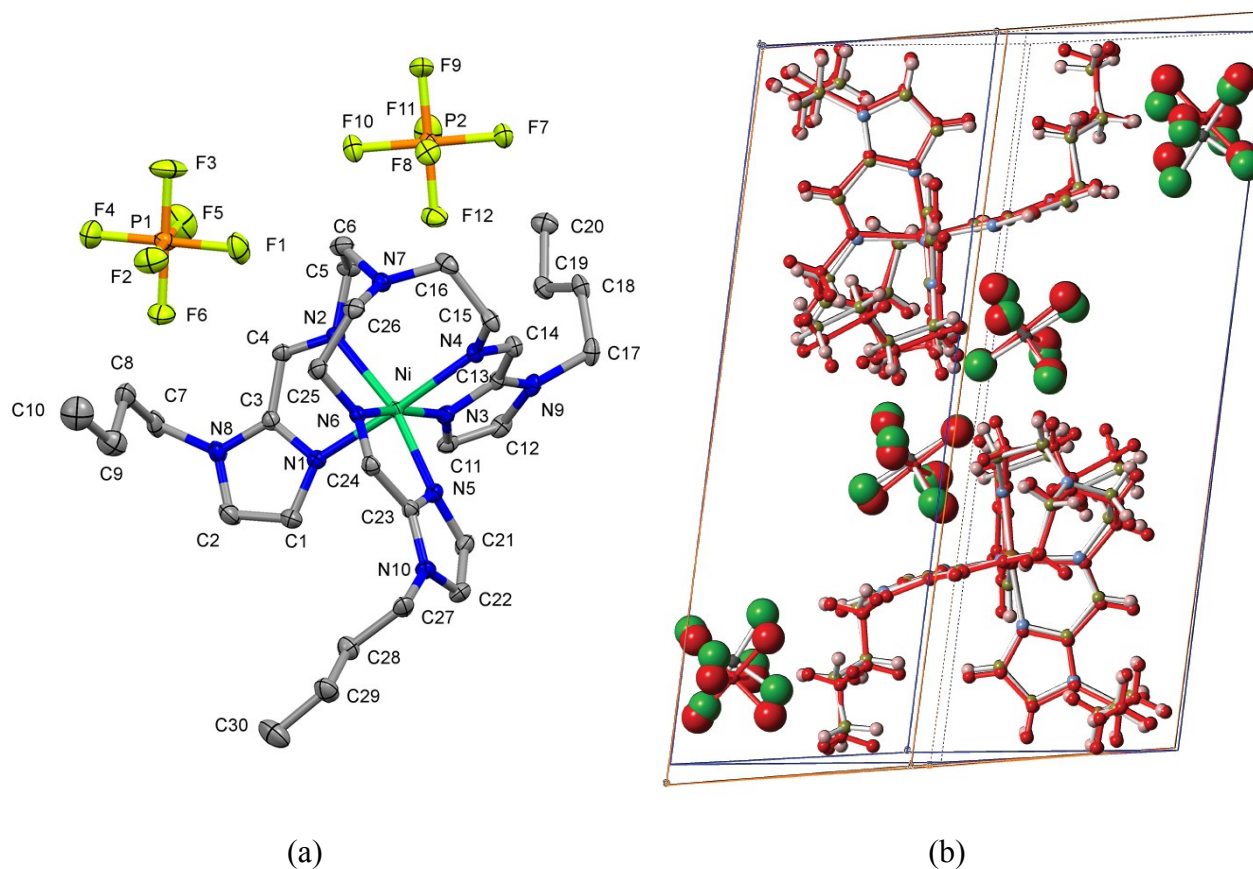

**Figure S9.** The Hirshfeld surface mapped with  $d_{\text{norm}}$  for the complex cation  $[\text{Fe}(n\text{Bu-im})_3(\text{tren})]^{2+}$  (top) and unit cell voids (bottom) for indicated phases

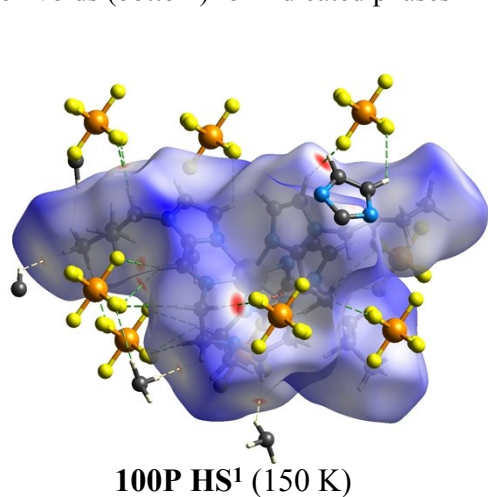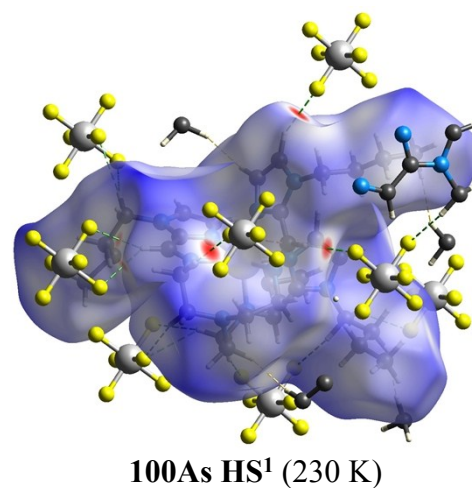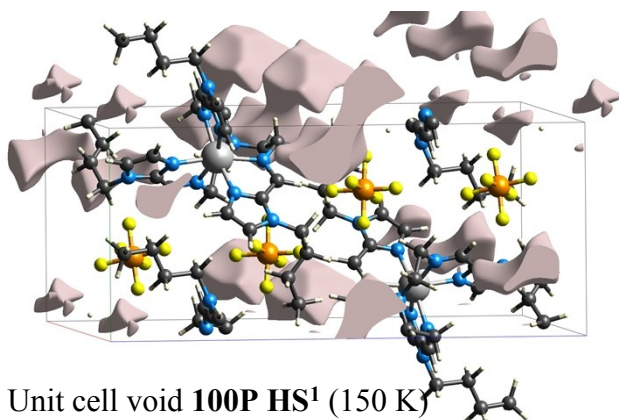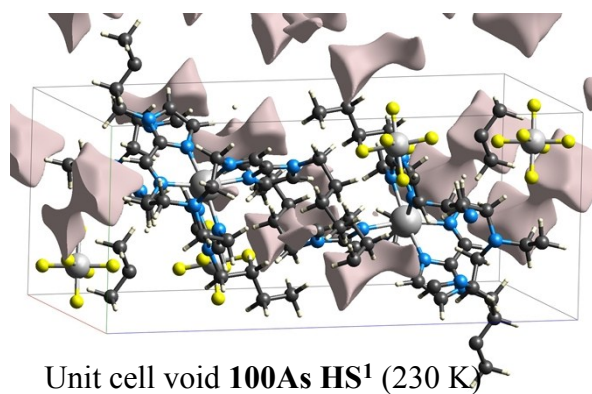

Figure S10. Infra-red spectra of representative  $[\text{Fe}(n\text{Bu-im})_3(\text{tren})](\text{P}_{1-y}\text{As}_y\text{F}_6)_2$  molecular

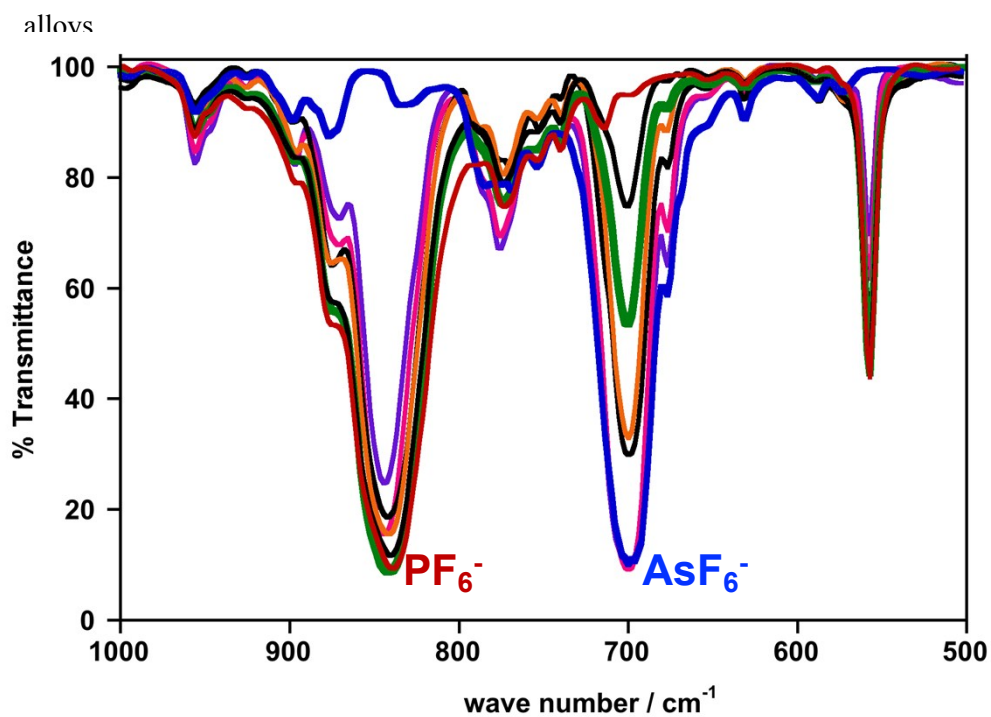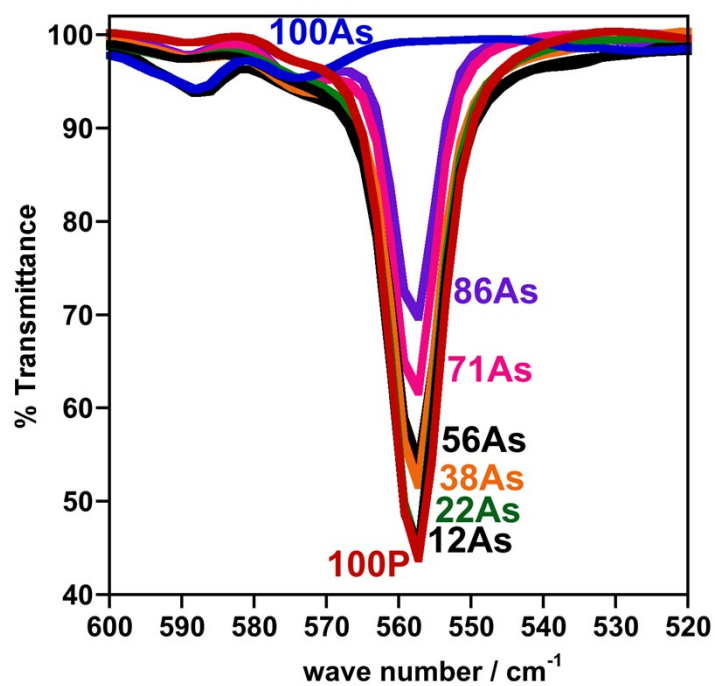

Supplement: SC-010-C8SC05256E-s001.pdf [file SC-010-C8SC05256E-s001.pdf]
